# Supplementary material
Source: PubMed Central journal article supplement (PMC395771)

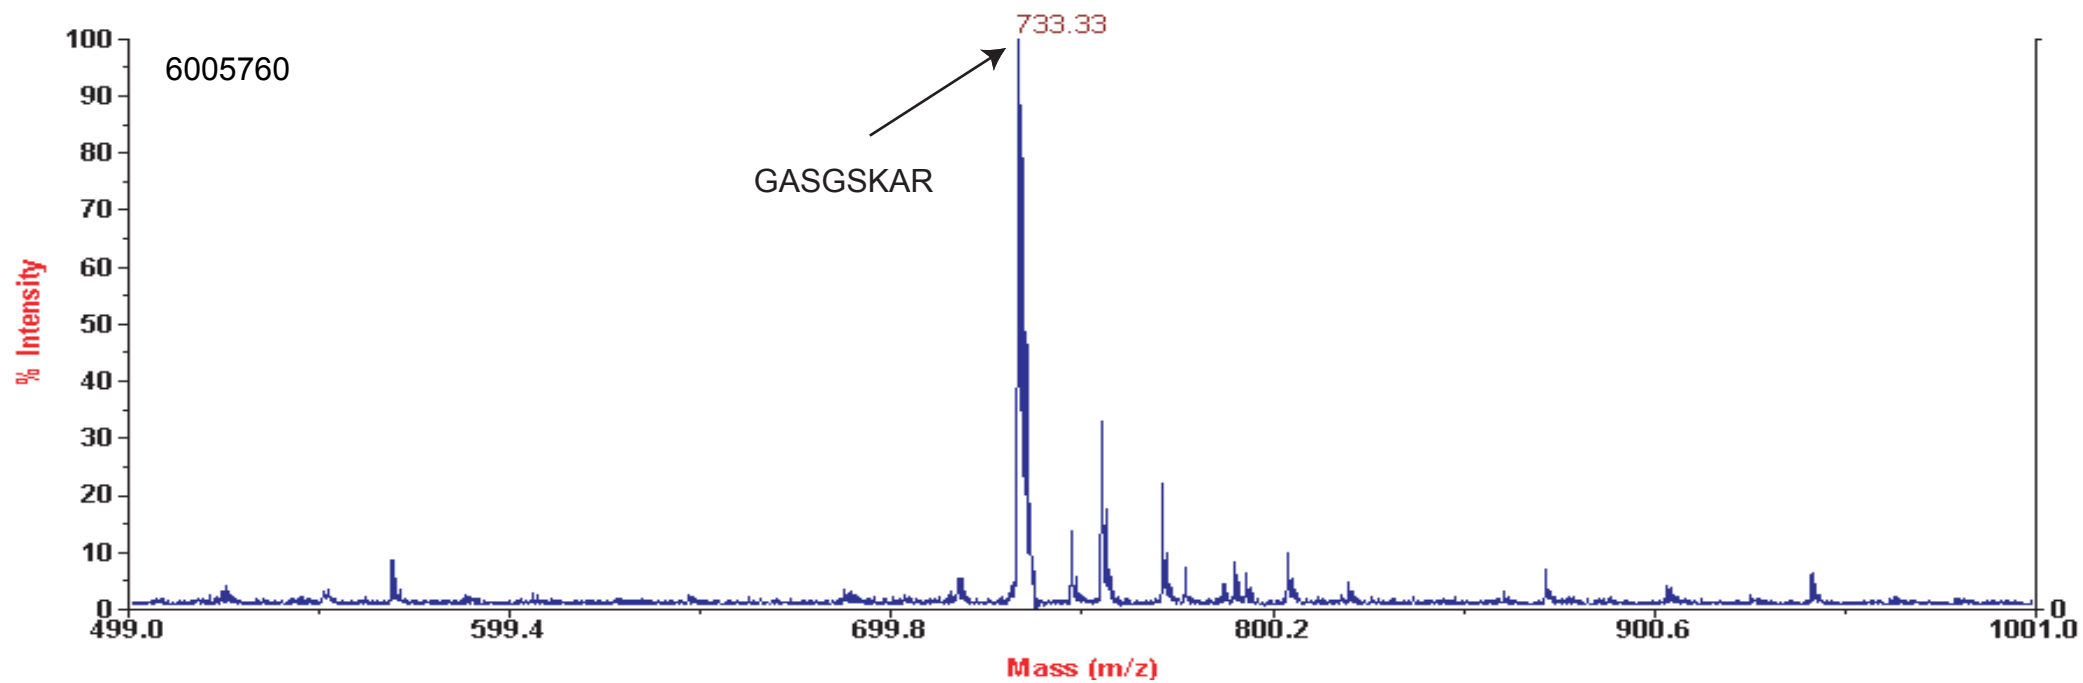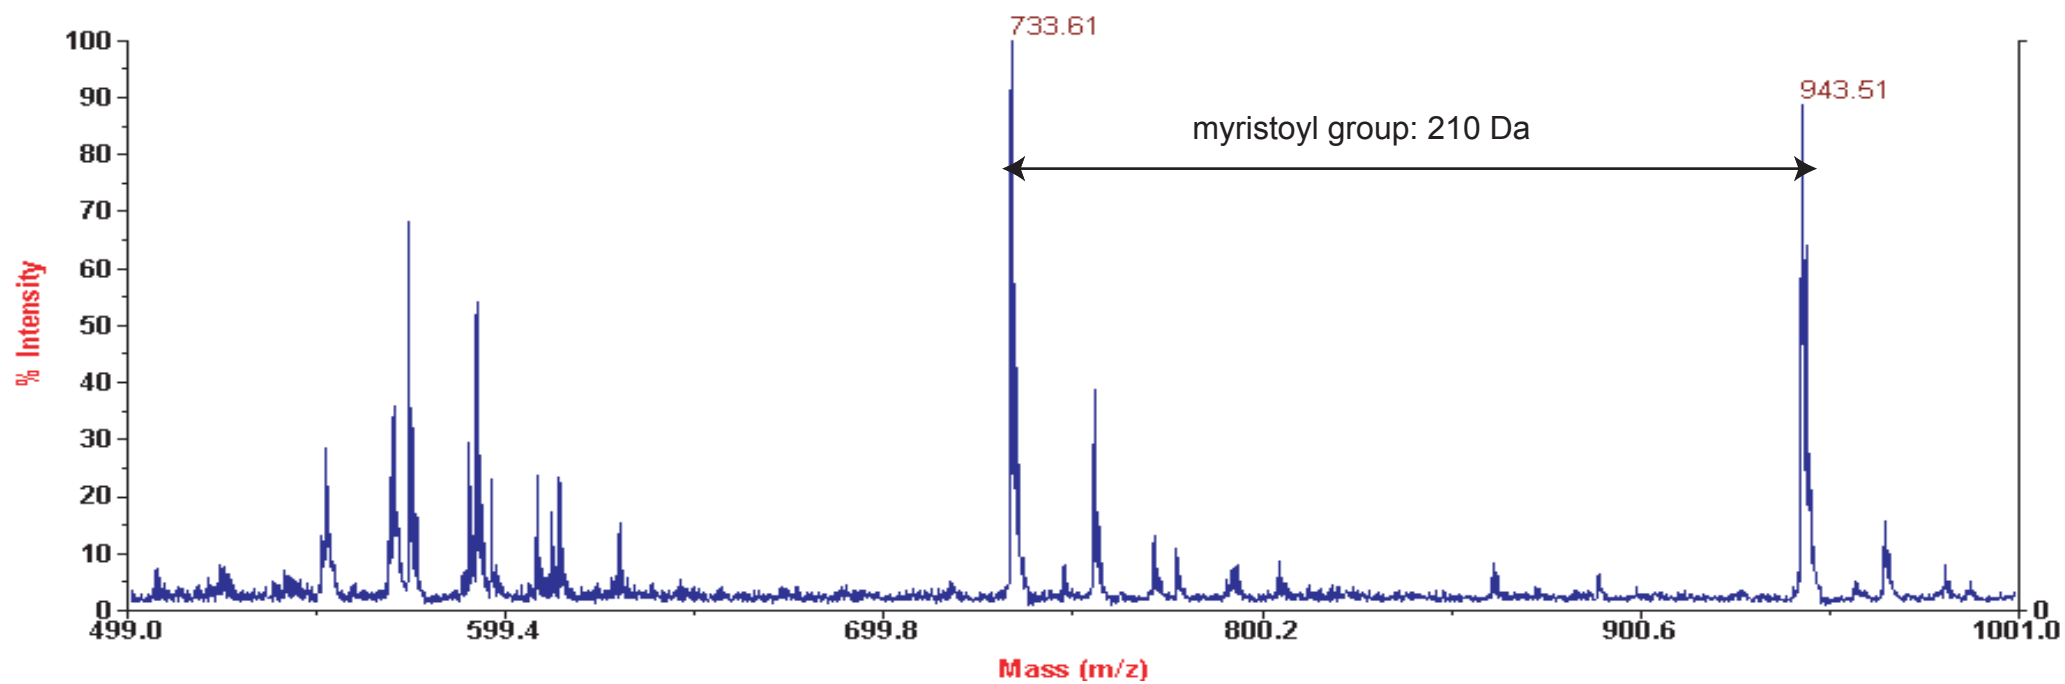

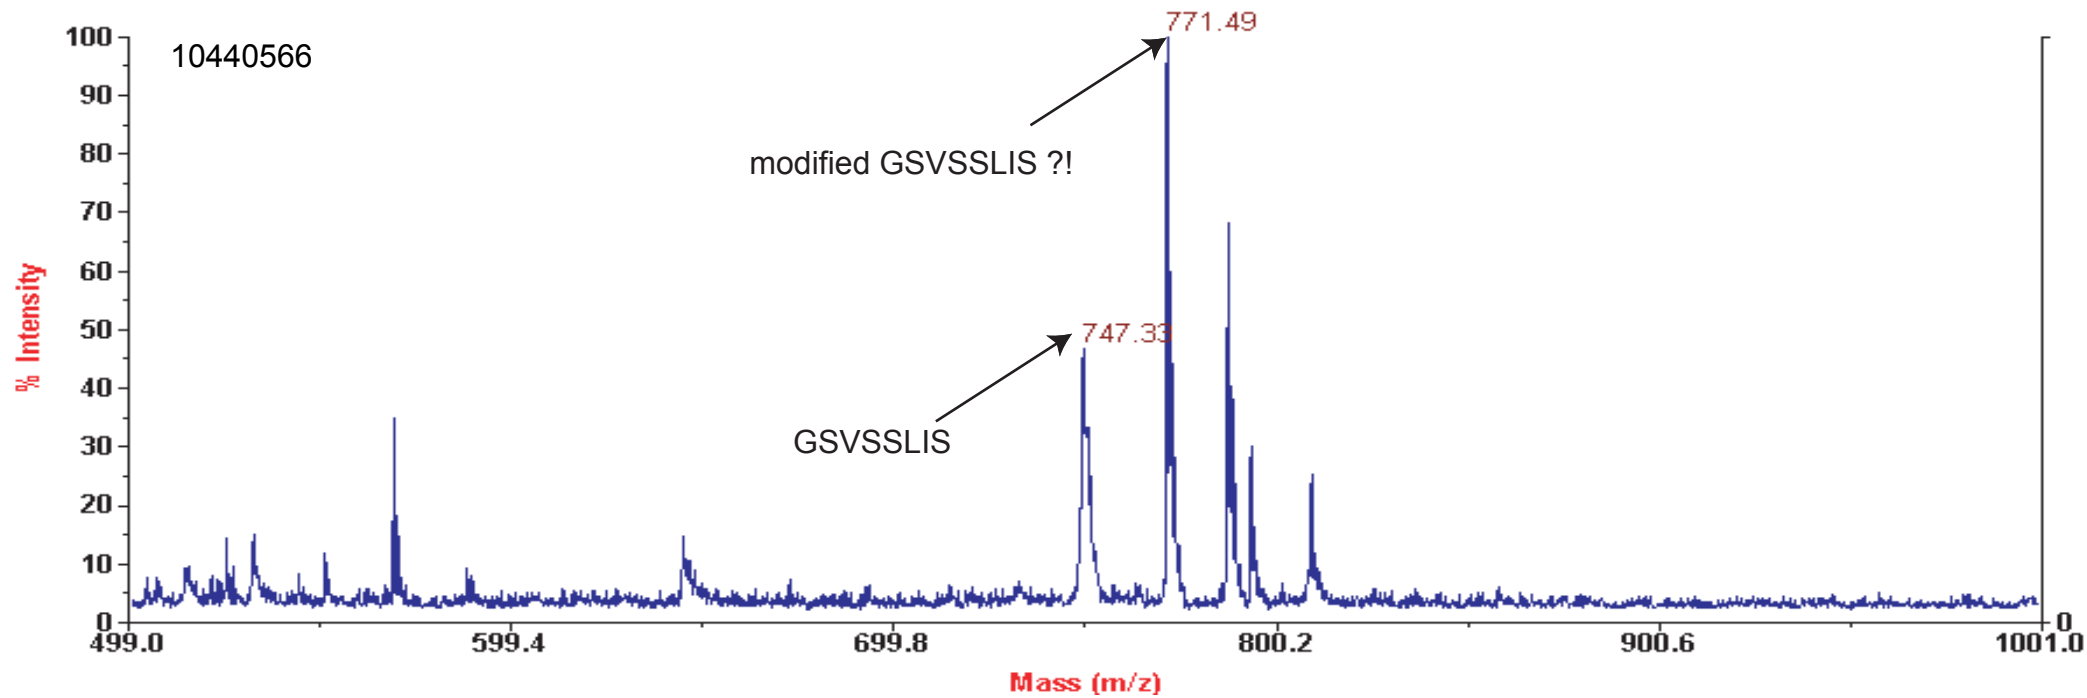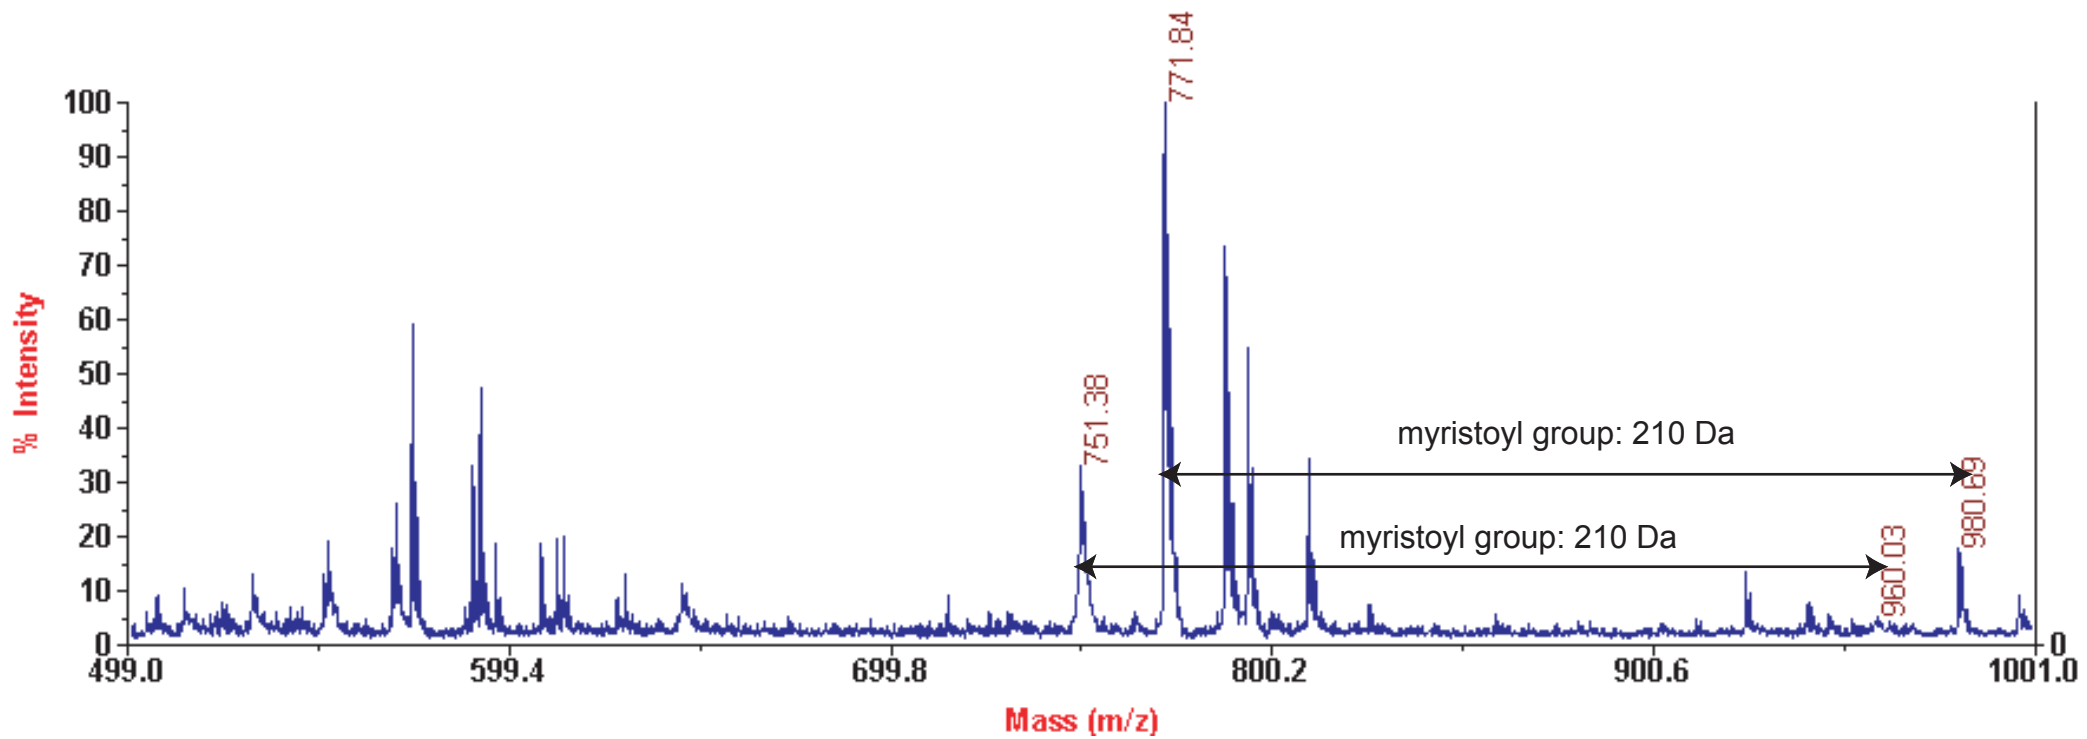

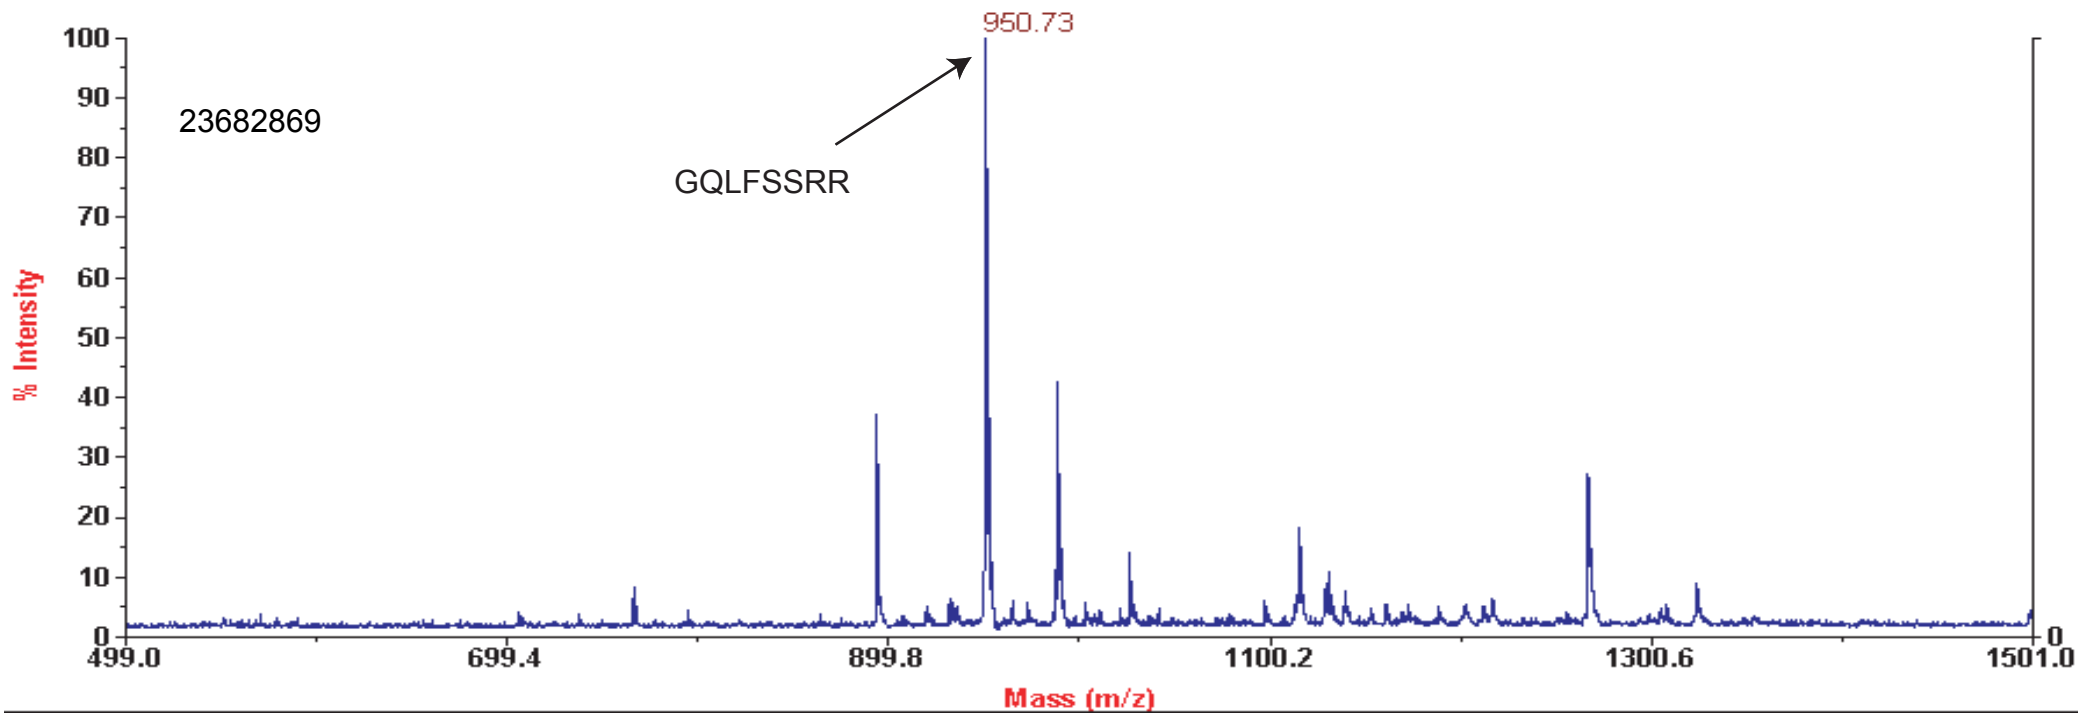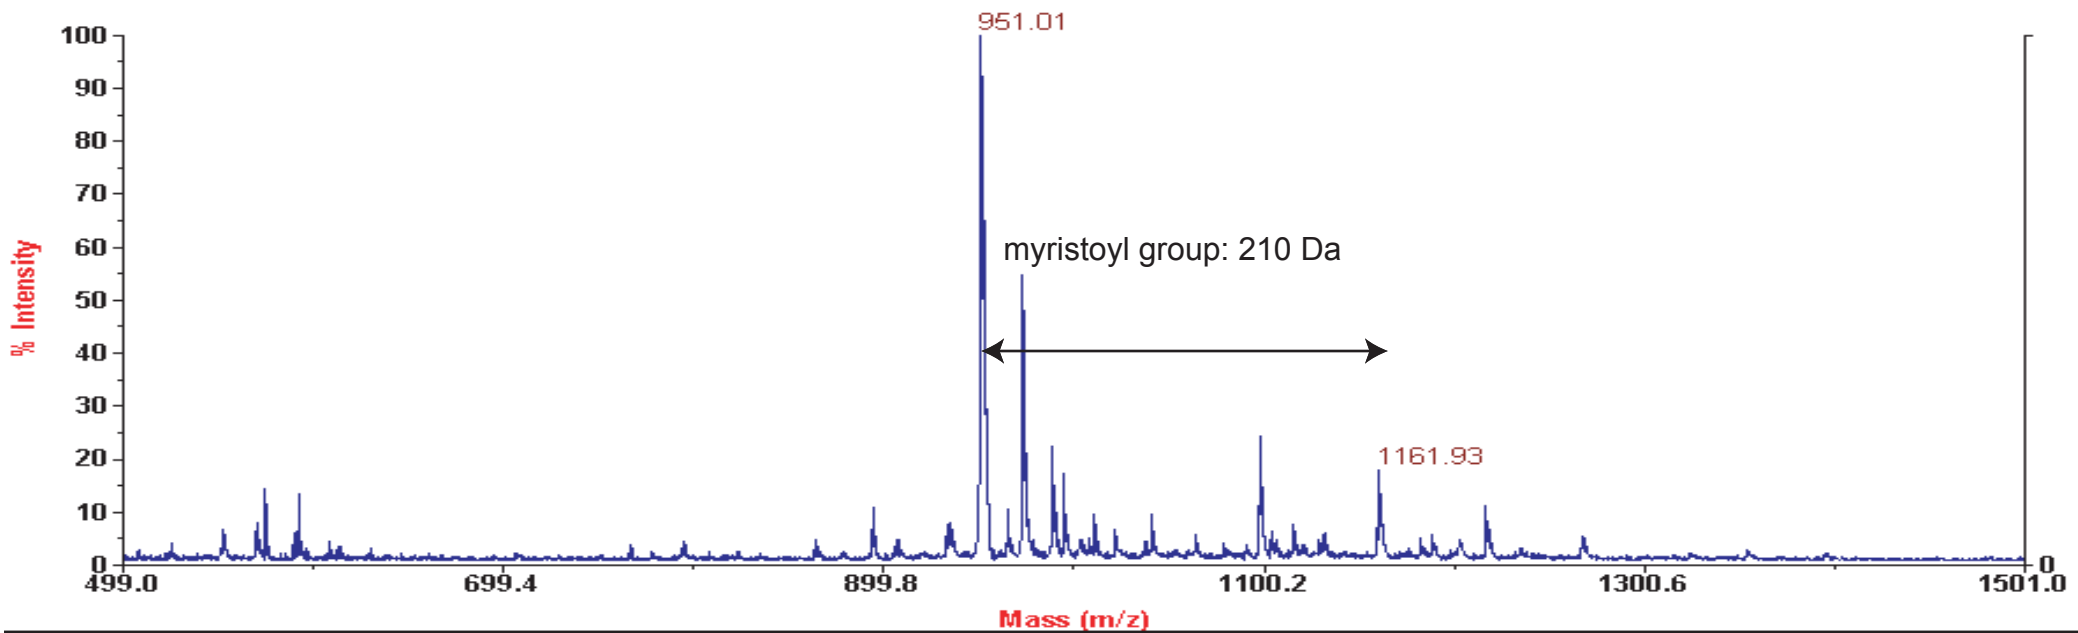

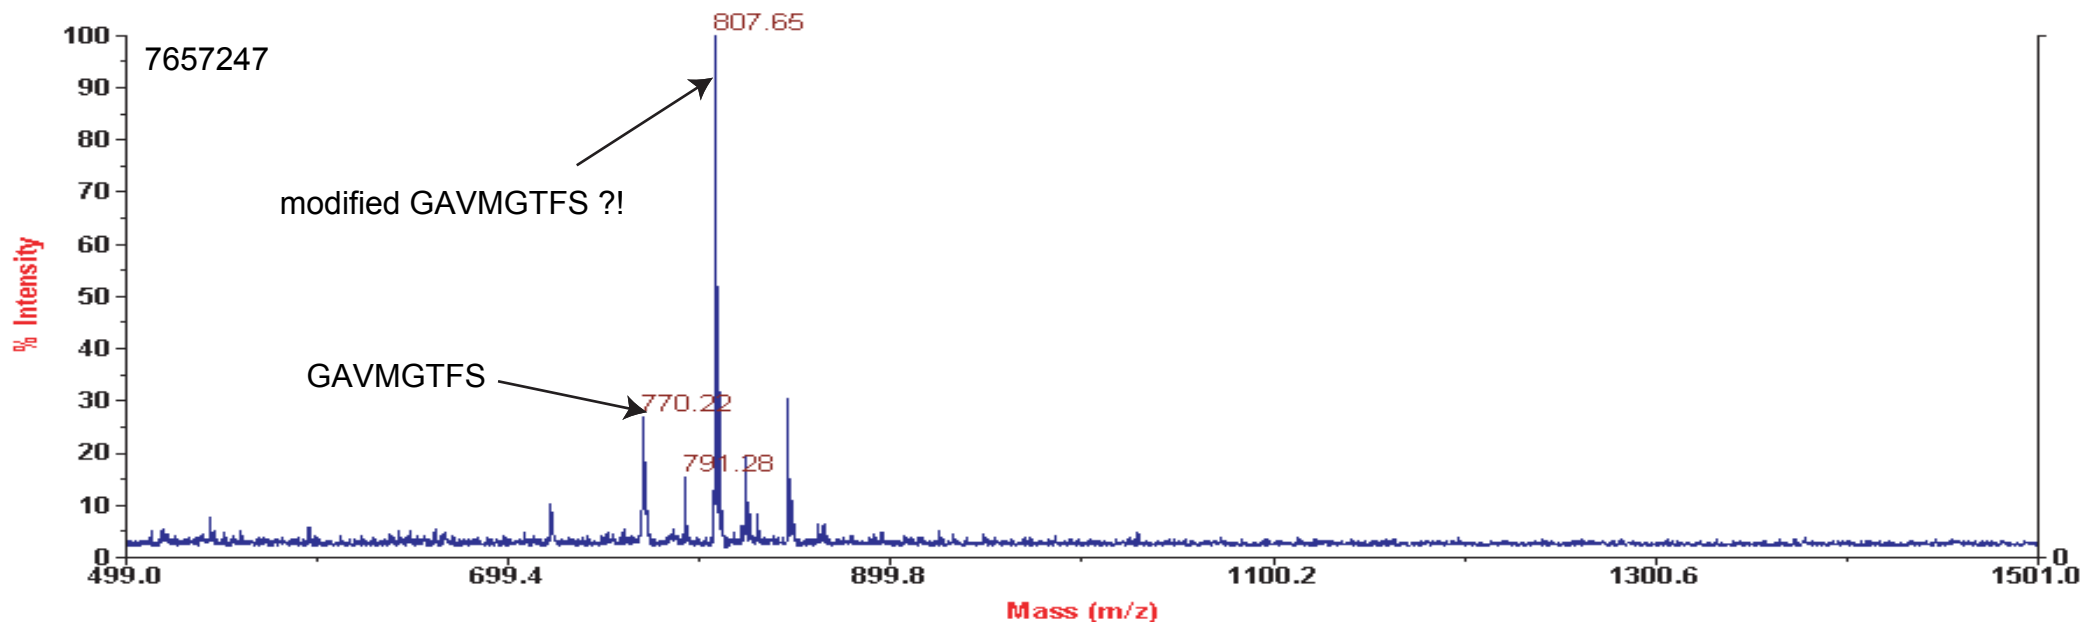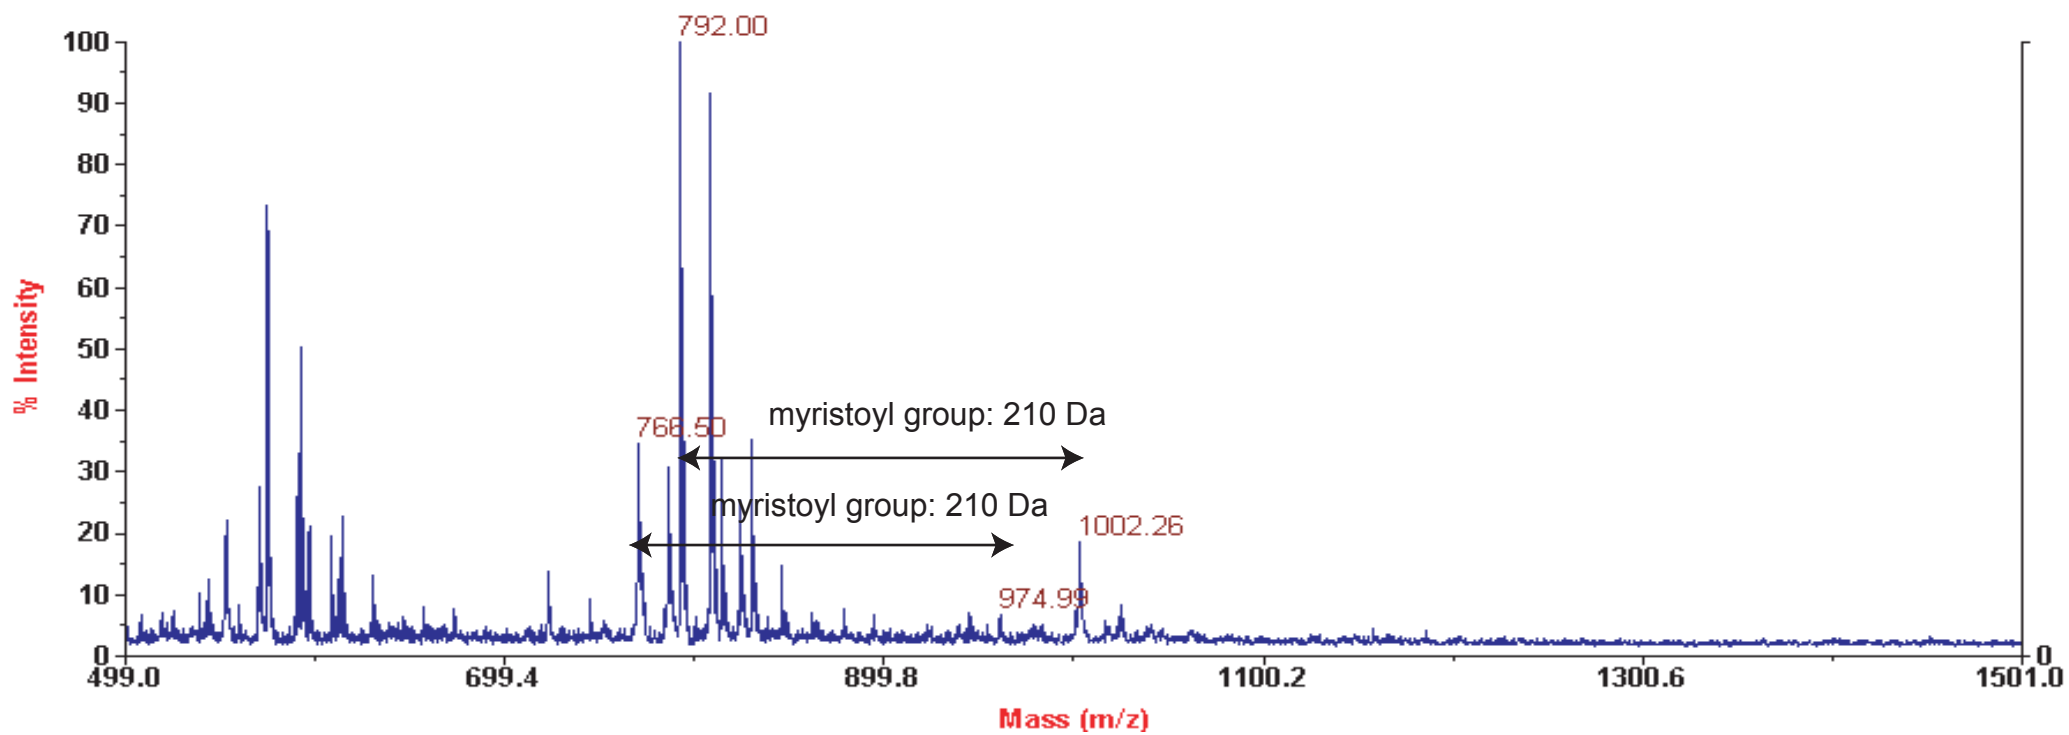

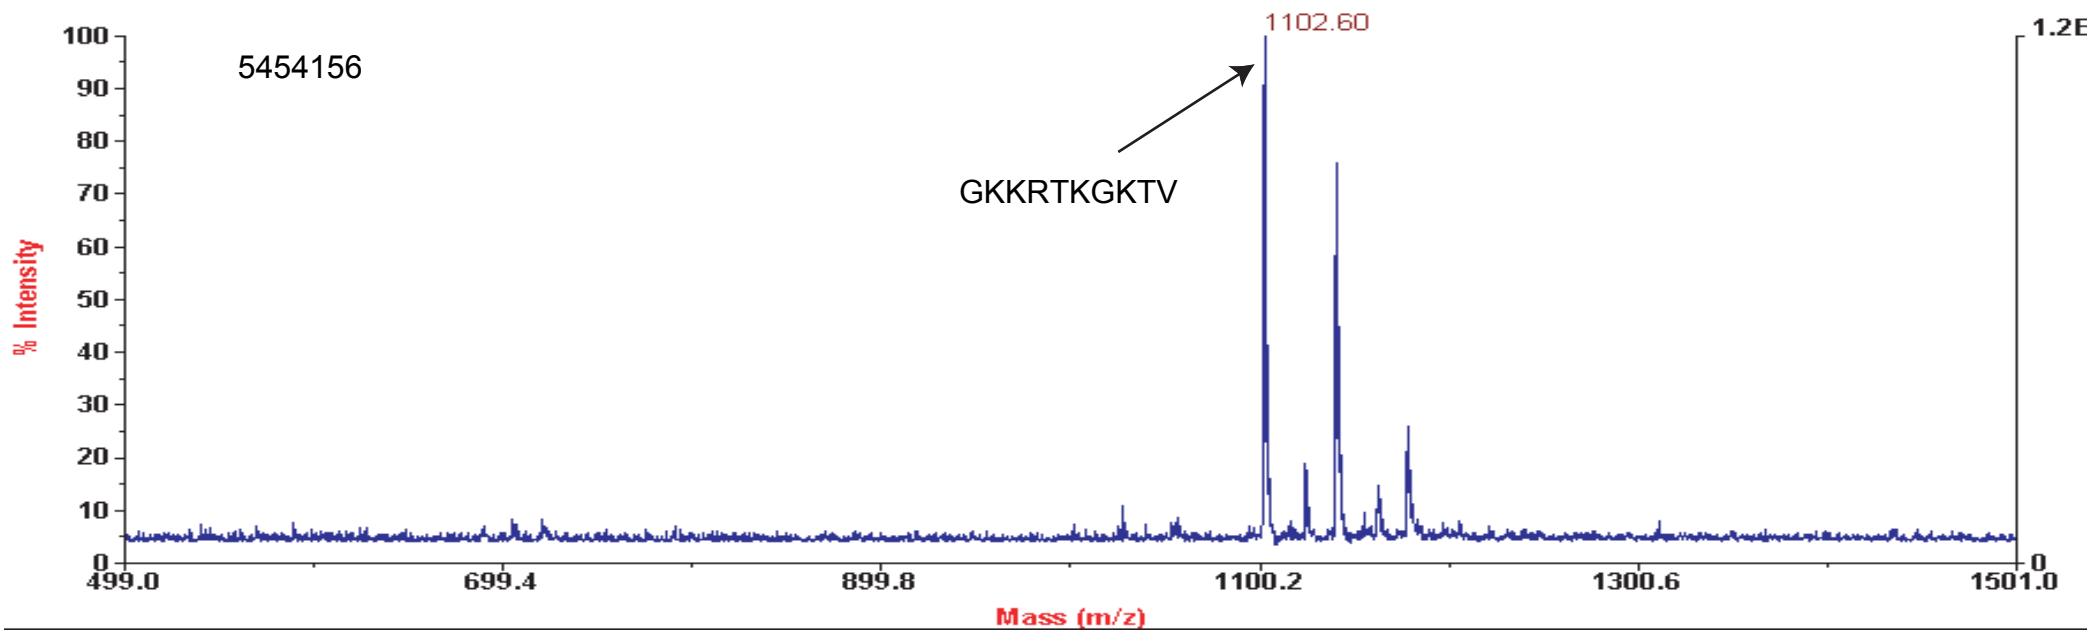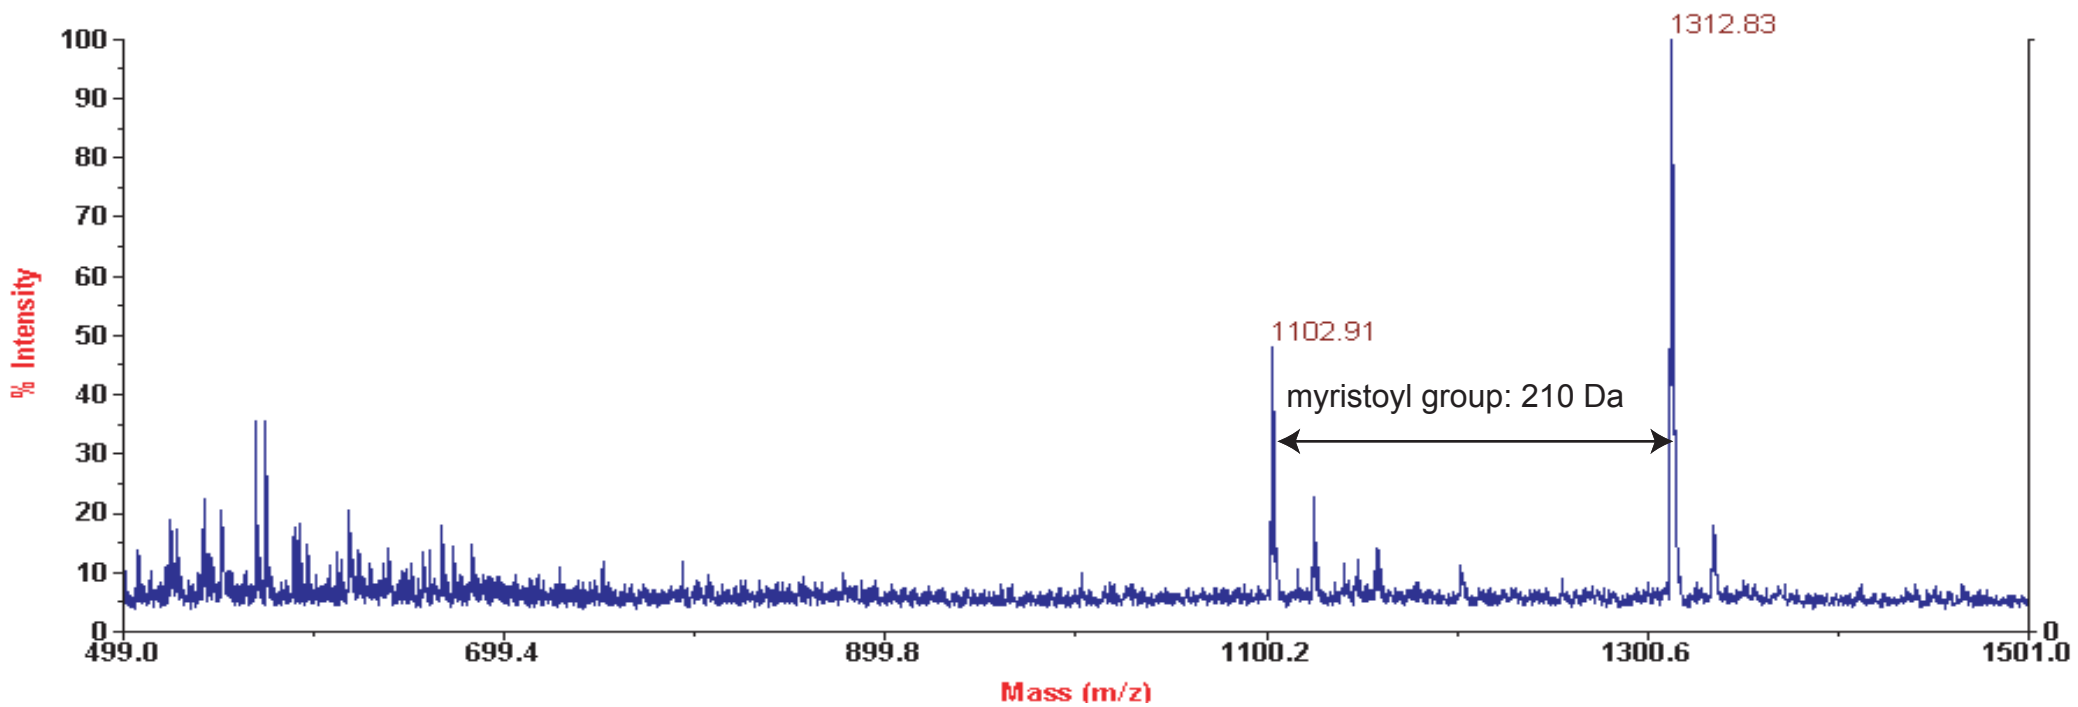

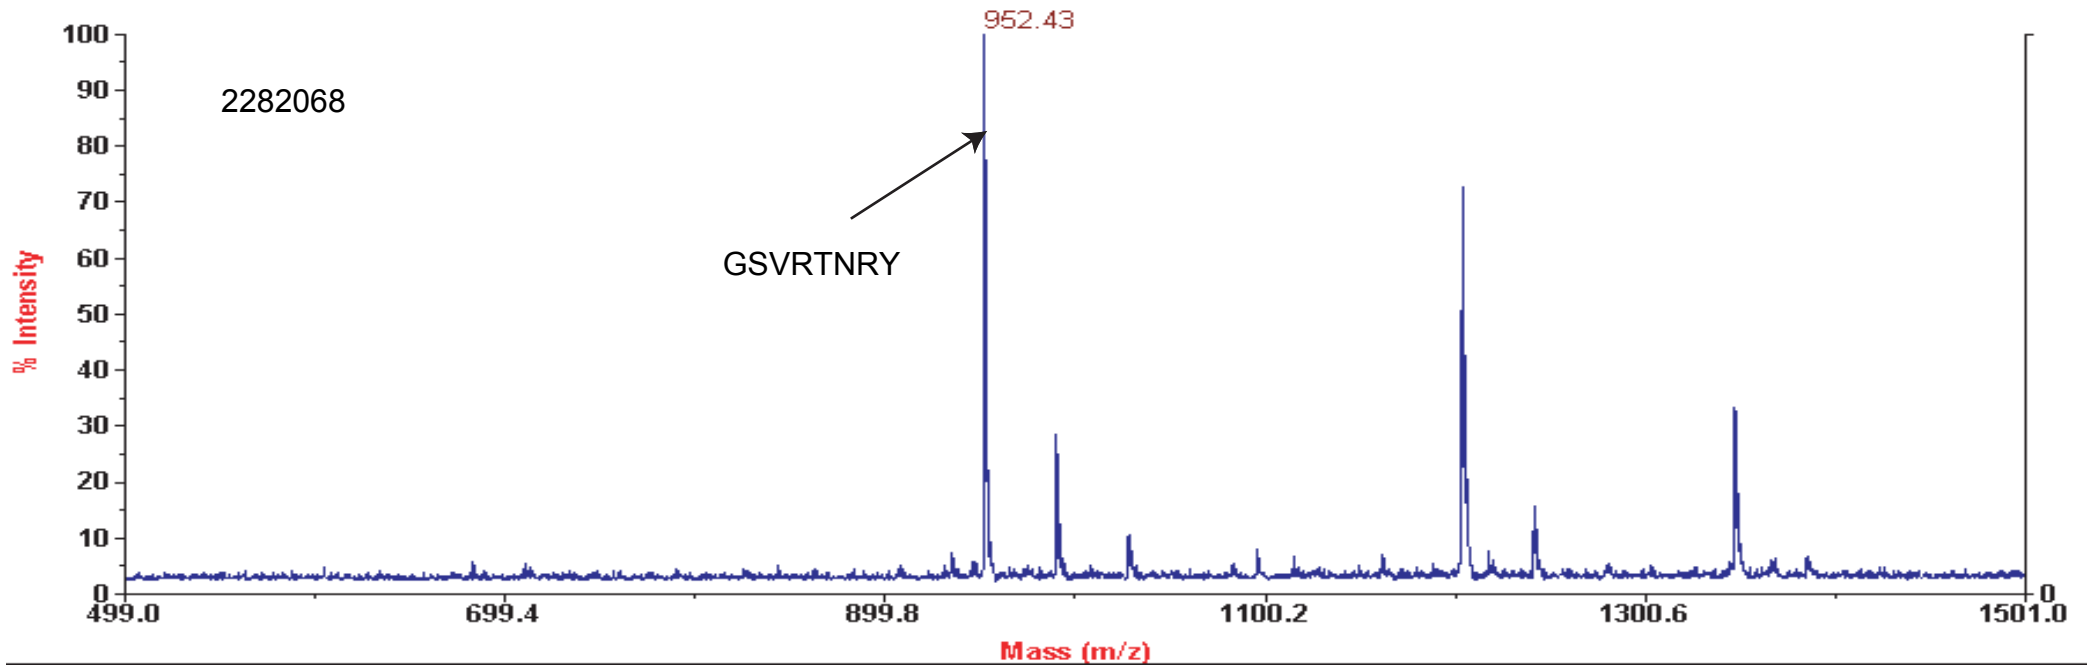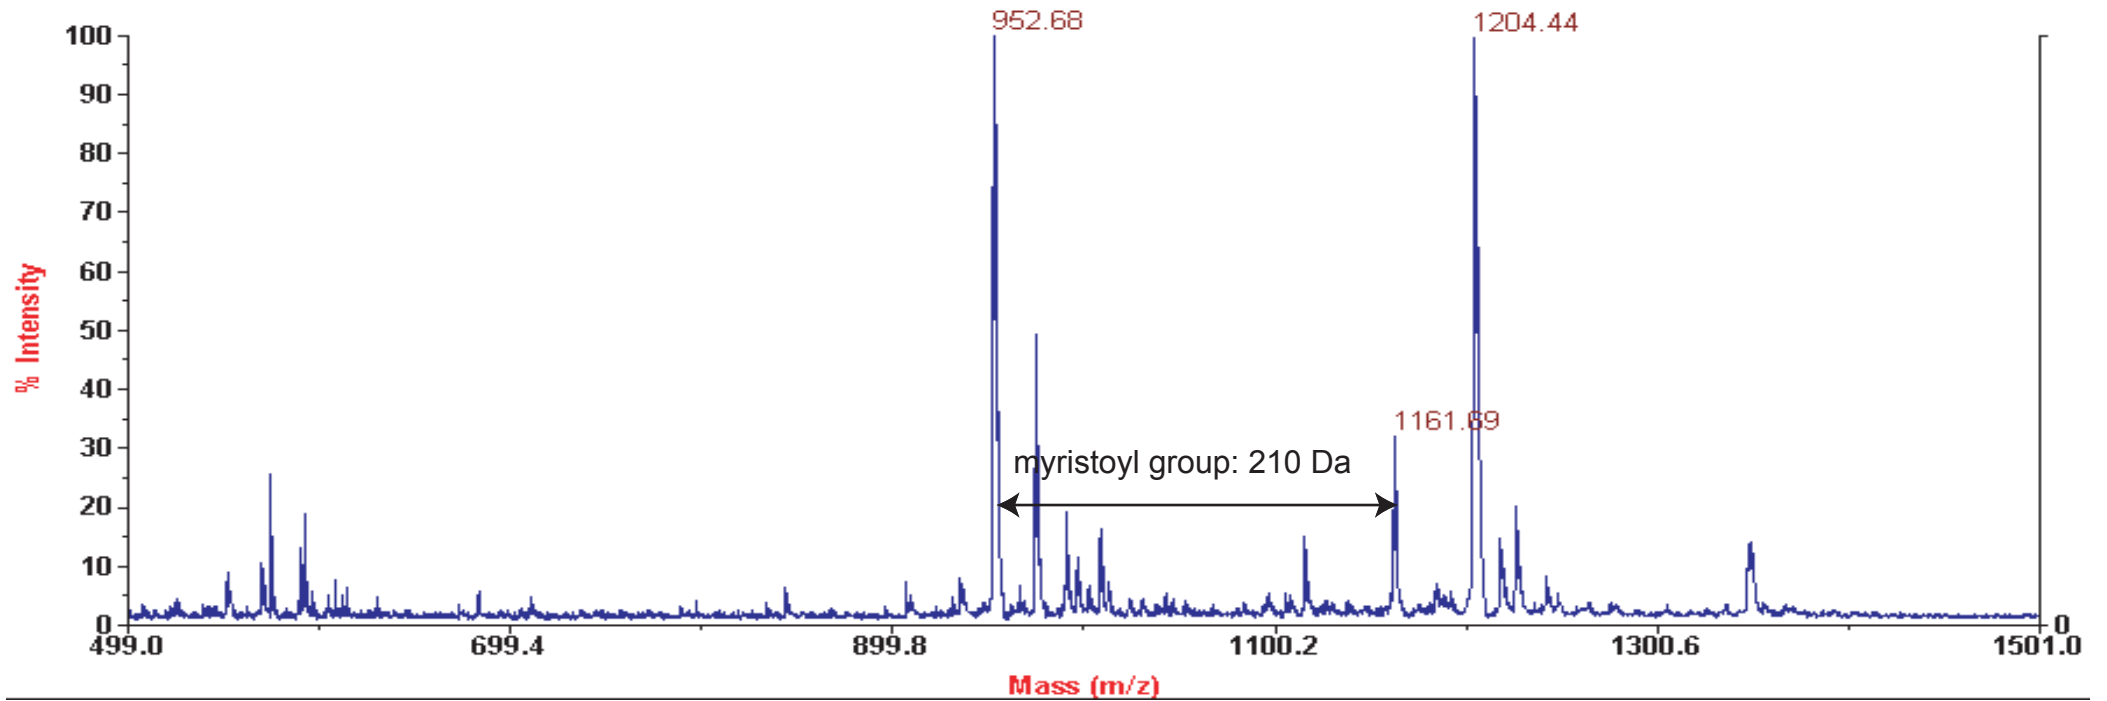

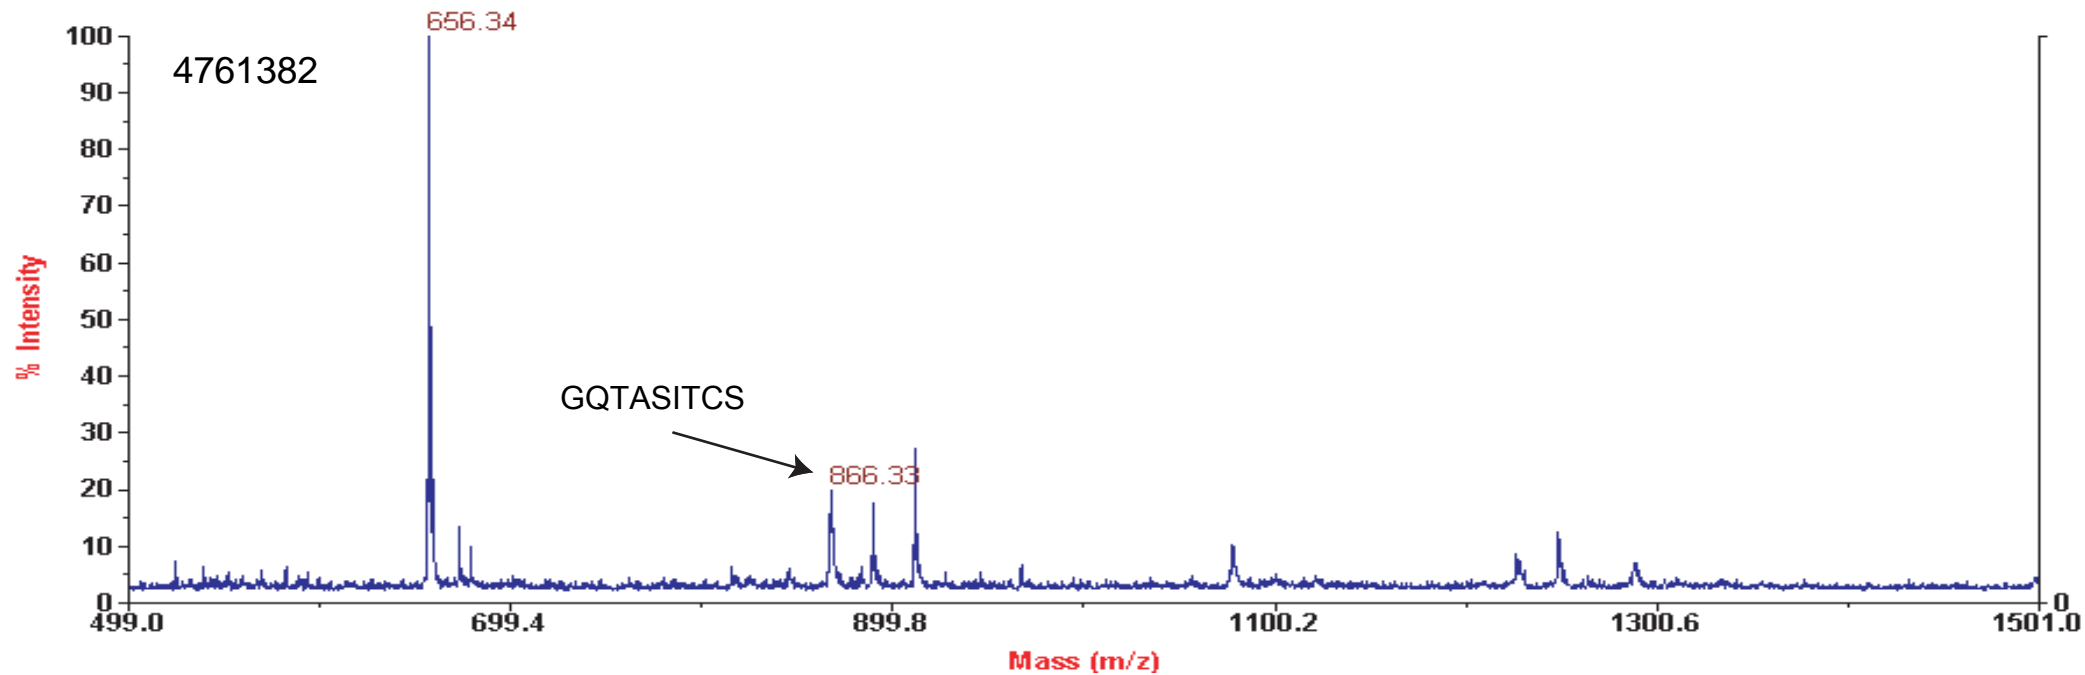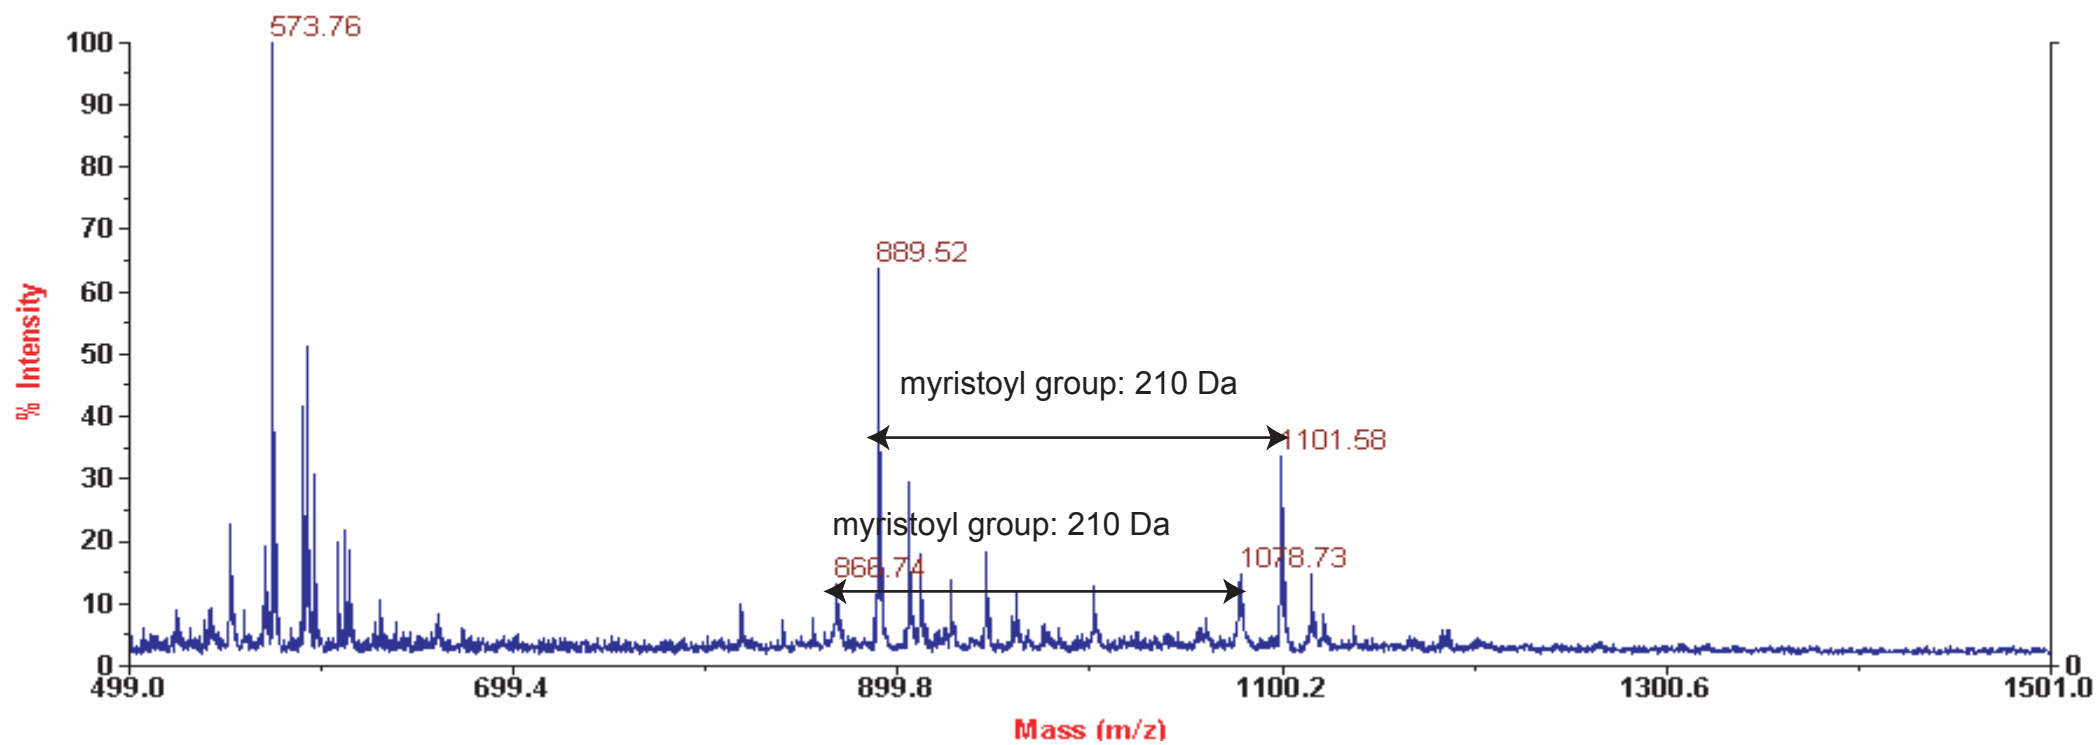

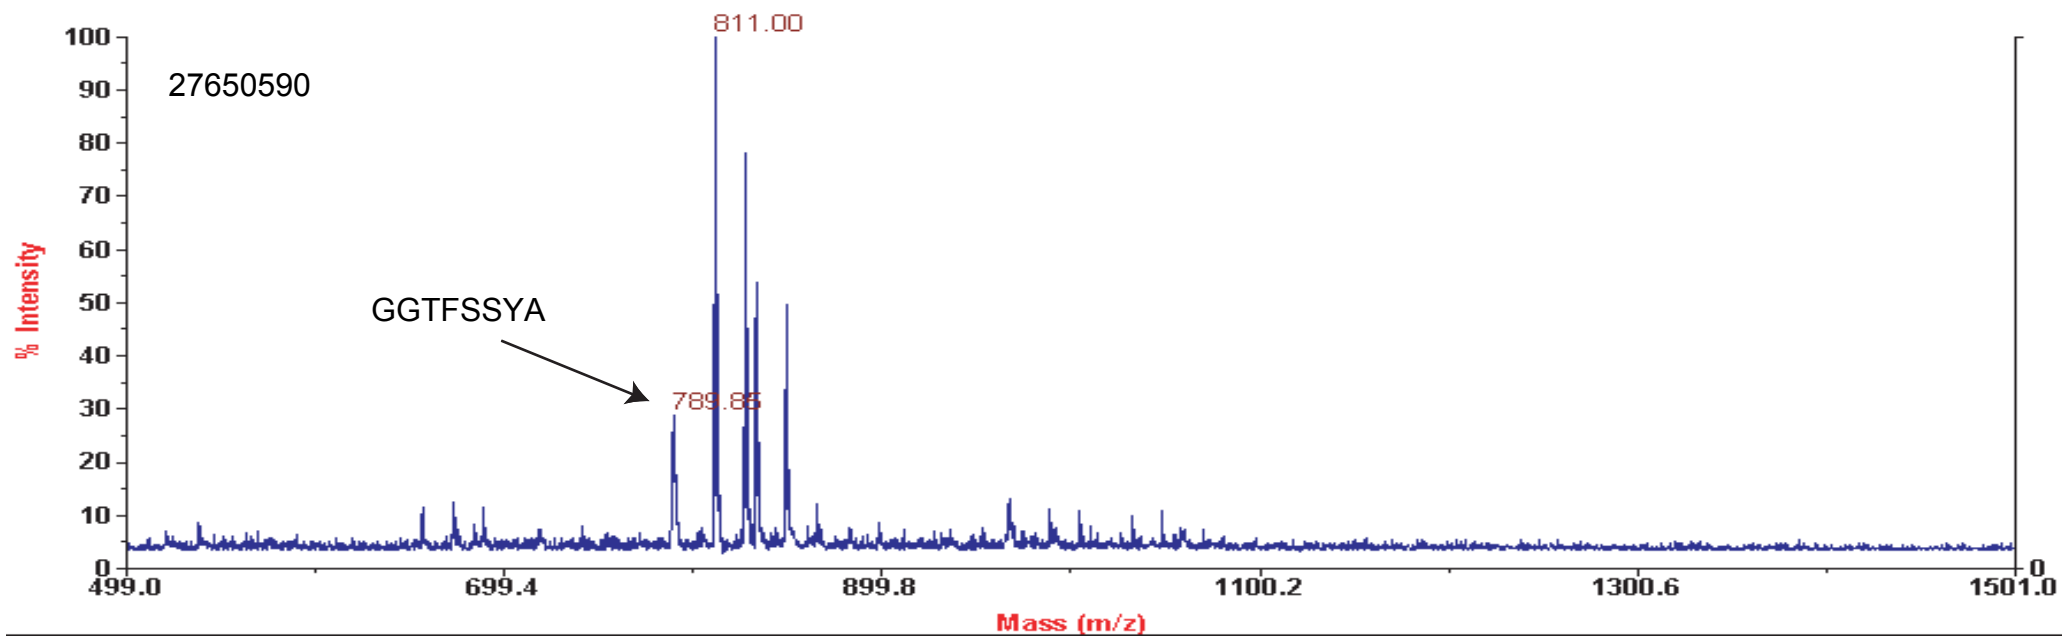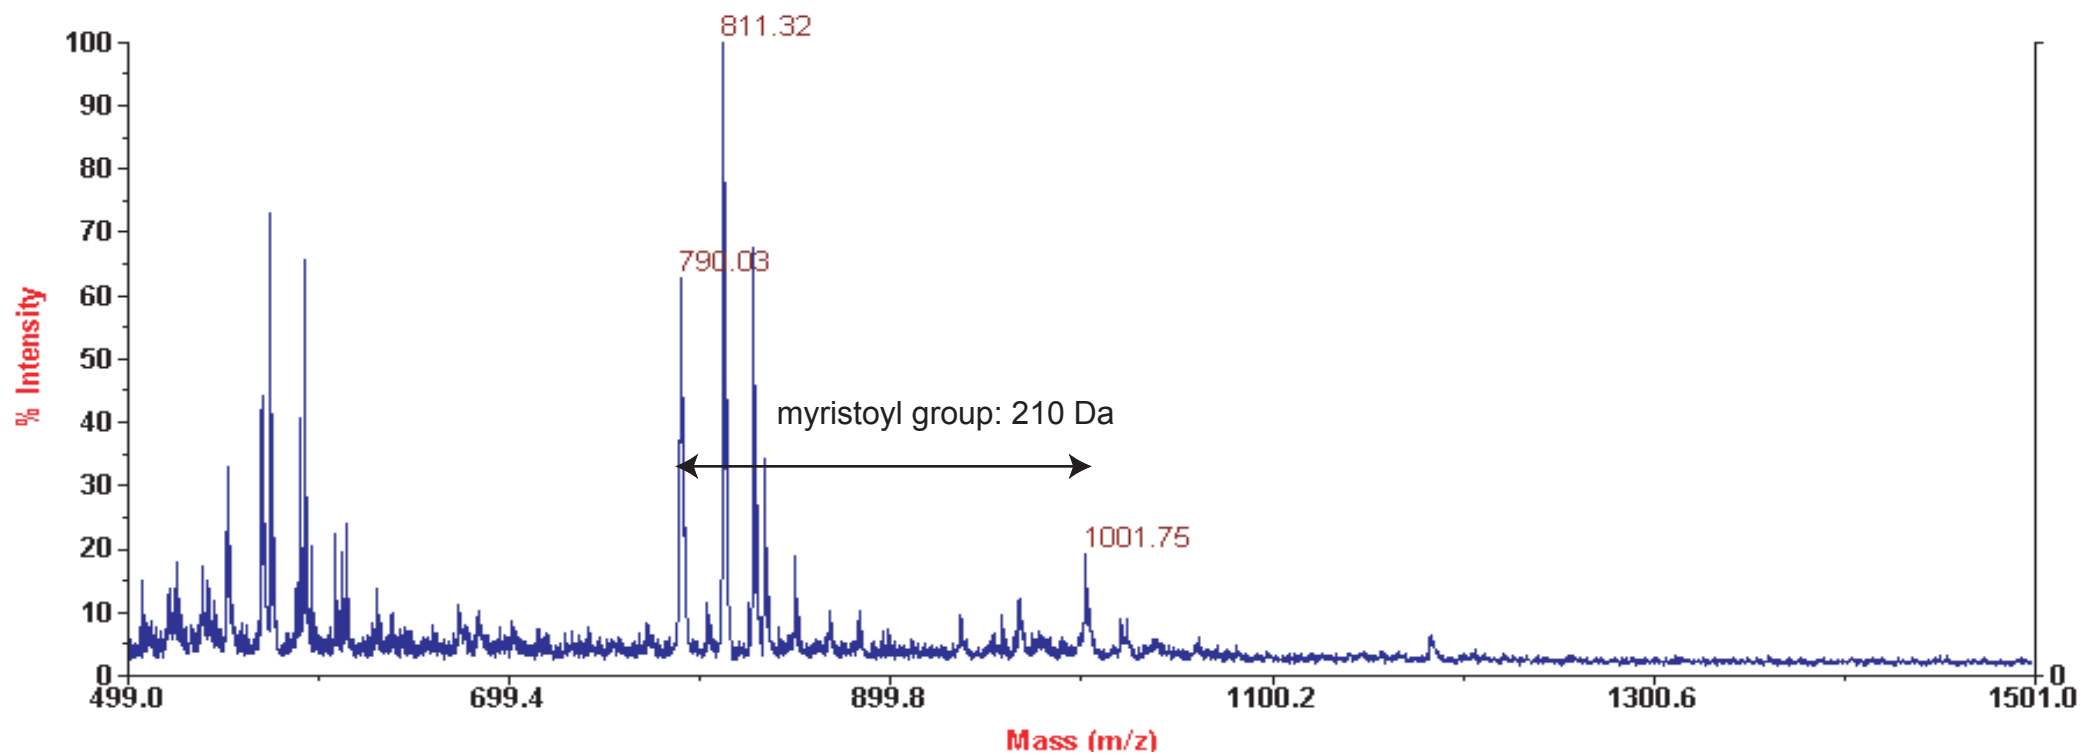



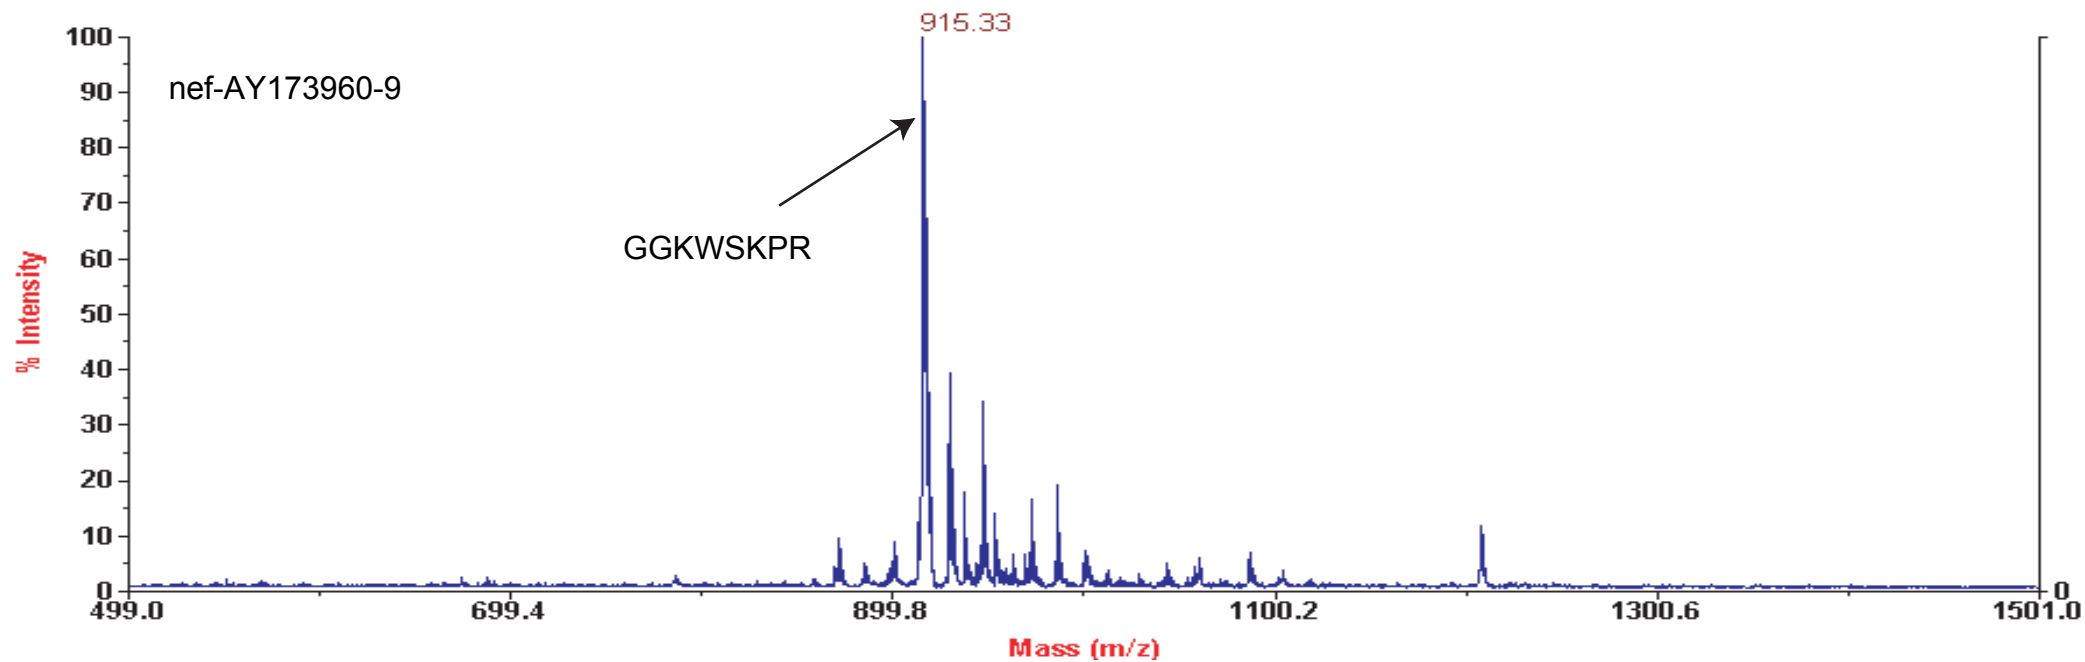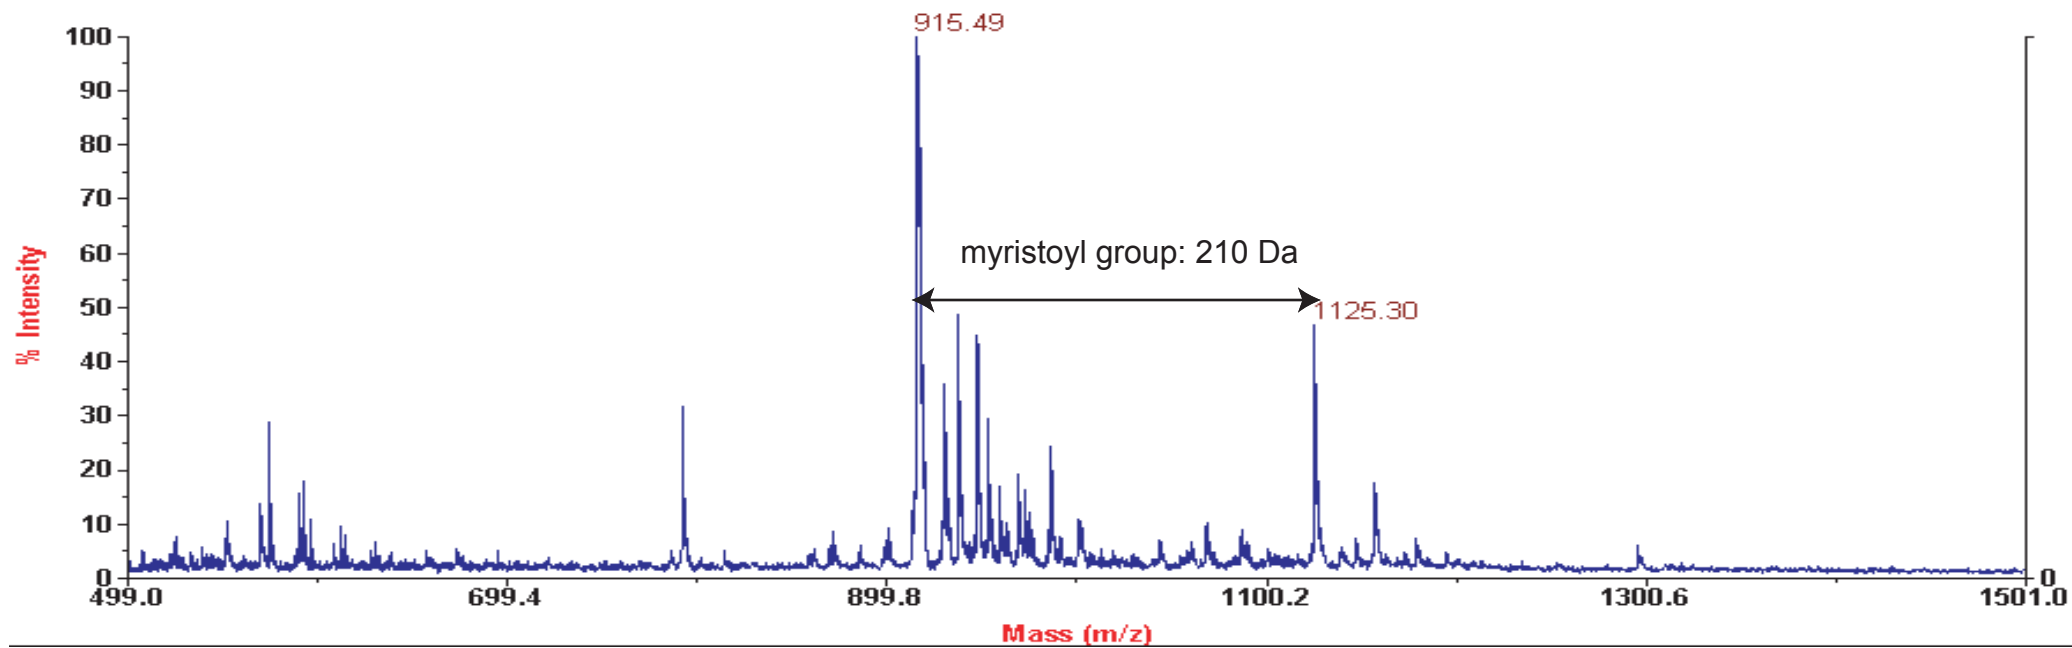

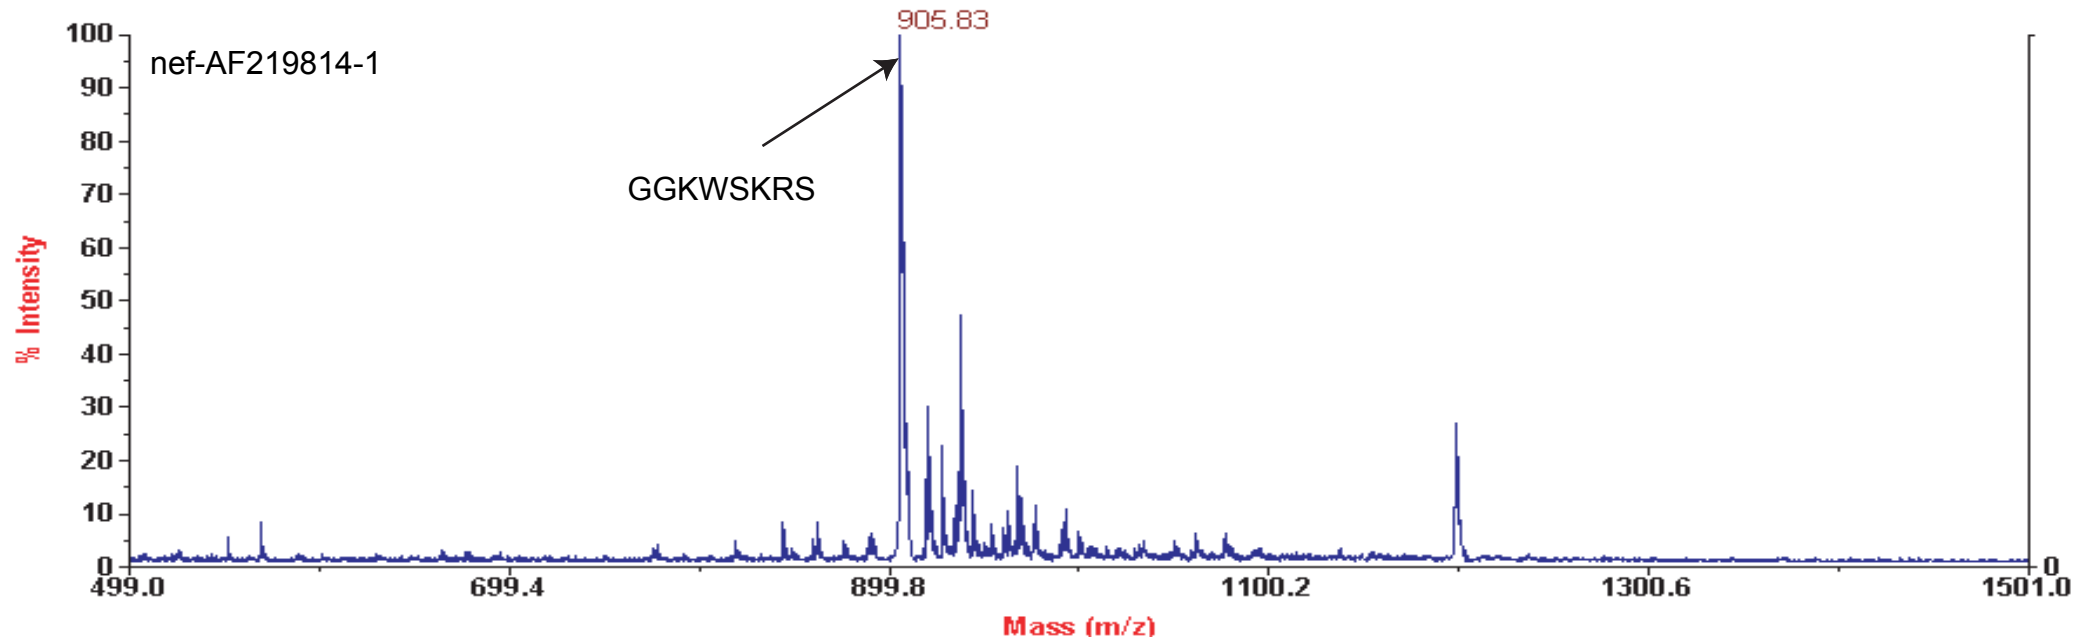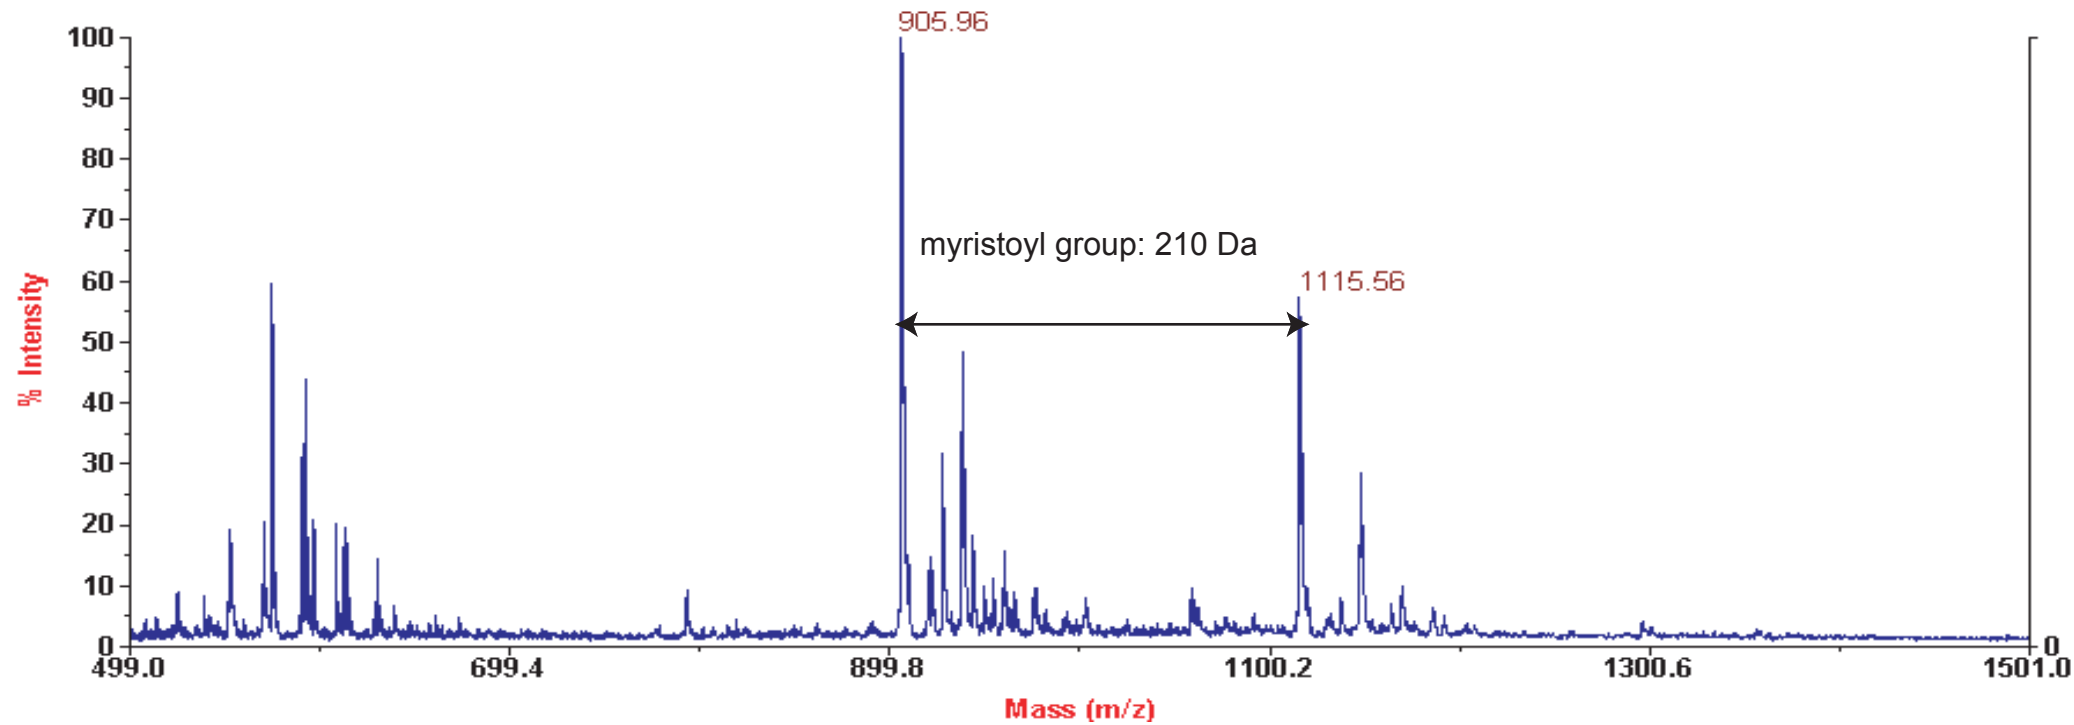

Supplement: gb-2004-5-3-r21-s1.pdf [file gb-2004-5-3-r21-s1.pdf]
